# Supplementary material
Source: publisher site journal article supplement (https://www.dovepress.com/article/238826)
Supplement: Supplementary file 1 [file get_supplementary_file.php]

**Supplementary materials**


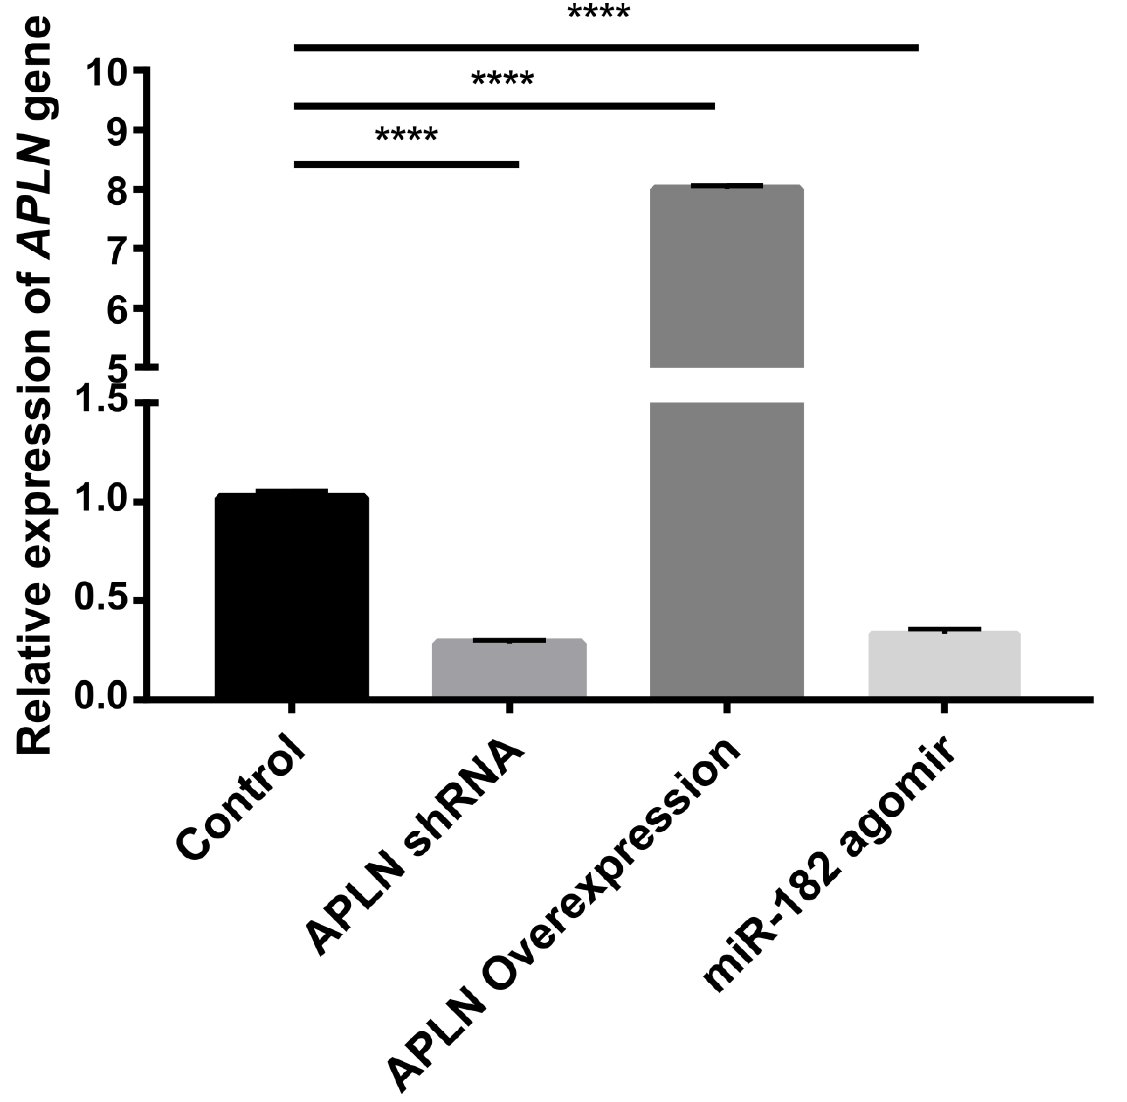


**Supplementary Figure 1 Expression of APLN in rat hippocampal neurons with kindled epilepsy**

Rats with kindled epilepsy were treated with APLN shRNA, APLN overexpression vector, and miR-182 agomir, injected via the tail. Rats included in the control group were treated with saline and Lipofectamine 2000. APLN expression in the hippocampal neurons were examined by qRT-PCT. *****P* < 0.0001.


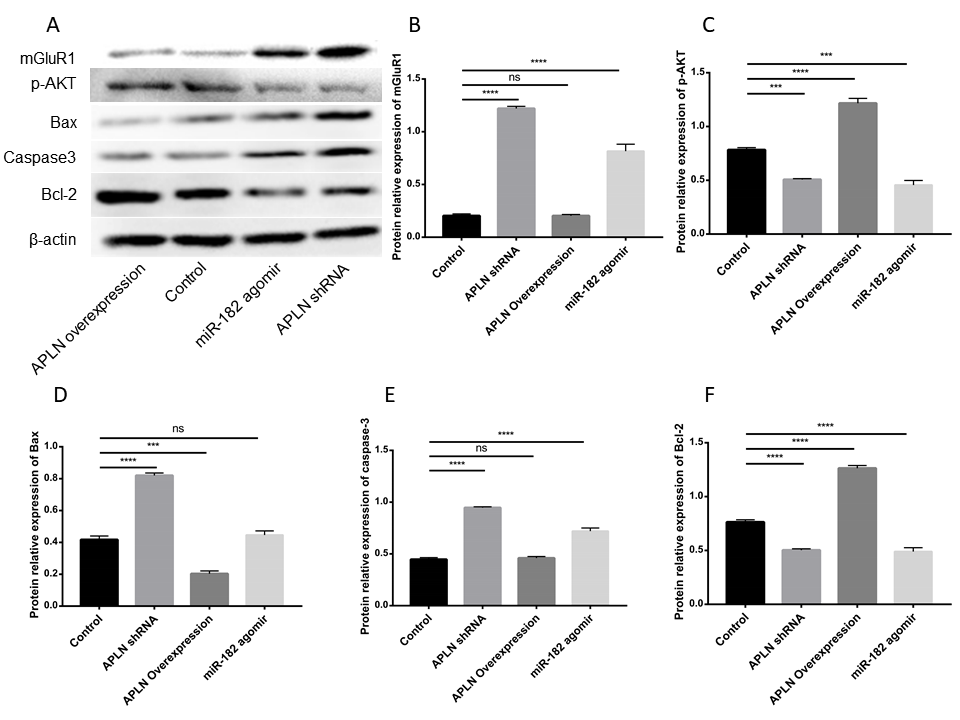


**Supplementary Figure 2 Expression of apoptosis-associated proteins, mGluR1, and p-AKT levels in the hippocampal neurons from rats with epilepsy**

Rats with kindled epilepsy were treated with APLN shRNA, APLN overexpression vector, and miR-182 agomir, injected via the tail. Rats included in the control group were treated with saline and Lipofectamine 2000. Protein expression was examined by Western blotting. β-actin was used as a loading control. A. Western blotting was performed to examine the protein levels of mGluR1, p-AKT, Bax, caspase-3, and Bcl-2. Statistical results of mGluR1 expression (B), p-AKT level (C), Bax expression (D), caspase-3 expression (E), and Bcl-2 expression (F) in different groups. ns, non-significant; ****P* < 0.001, *****P* < 0.0001.


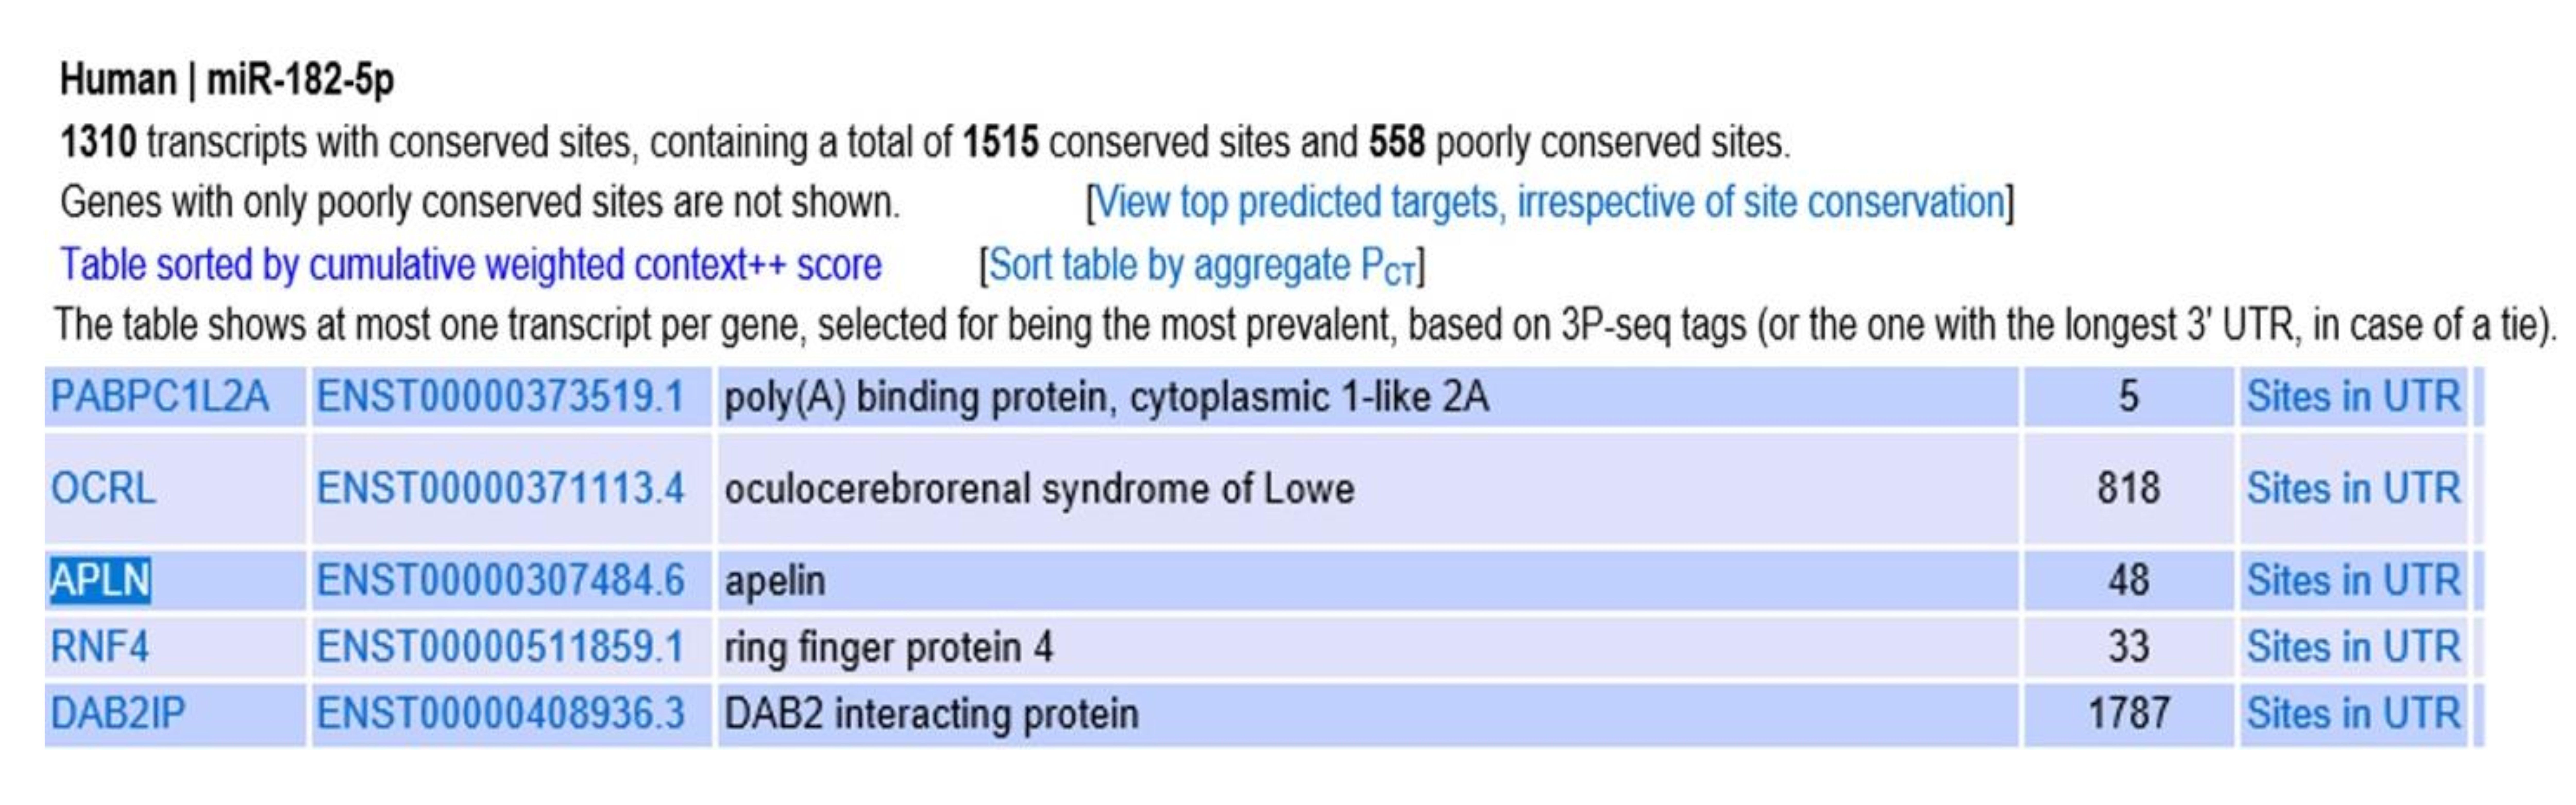


**Supplementary Figure 3 Target gene prediction for miR-182**
